# Supplementary material for: Versorgung älterer Patienten durch Gemeindenotfallsanitäter
Source: Springer Nature journal article supplement (doi:10.1007/s00063-021-00863-8), 2021-09-16
Supplement: MOESM1 [file 19668540]

**Tabelle S1:** Angaben GNFS-Protokoll

|                                                                                                                                                                                              |                 |
|----------------------------------------------------------------------------------------------------------------------------------------------------------------------------------------------|-----------------|
| <b>Demografische Daten</b>                                                                                                                                                                   |                 |
| Geburtsjahr, Geschlecht                                                                                                                                                                      |                 |
| <b>Sonstiges</b>                                                                                                                                                                             |                 |
| First Responder Einsatz, Patient aus Pflegeheim                                                                                                                                              | Einfachauswahl  |
| <b>PZC (Patientenzuweisungscode)</b>                                                                                                                                                         |                 |
| PZC 0: kein Transport<br>PZC 1: sofortige intensivmedizinische Intervention<br>PZC 2: stationäre Aufnahme wahrscheinlich<br>PZC 3: ambulante Behandlung                                      | Einfachauswahl  |
| <b>Maßnahmen</b>                                                                                                                                                                             |                 |
| Beratungsgespräch, Hilfe bei Selbstmedikation oder Inhalation, Verbandwechsel/Wundversorgung, Kompressionsstrümpfe, Urinstix, Dauerkatheter anlegen/entfernen, i.v.-Zugang, Medikamentengabe | Mehrfachauswahl |
| <b>Inanspruchnahme Telemedizin</b>                                                                                                                                                           |                 |
| Wurde genutzt: nach Algorithmus, eigene Entscheidung, sonstiges<br>Wurde nicht genutzt: nicht erforderlich, kein Funkempfang, stand nicht zur Verfügung                                      | Mehrfachauswahl |
| <b>Notwendigkeit eines Transports</b>                                                                                                                                                        |                 |
| Rettungswagen, Krankentransportwagen, Taxi/Mietwagen, Rollstuhltransport, privater Transport oder auf Verzicht auf Transport                                                                 | Einfachauswahl  |
| <b>Empfehlungen</b>                                                                                                                                                                          |                 |
| Vorstellung: Hausarzt, KV-Bereitschaftsdienst, kinderärztlicher Notdienst, Notaufnahme, Information von Angehörigen, des ambulanten Pflegedienstes oder Krisenintervention                   | Mehrfachauswahl |
| <b>Kontaktaufnahme zum Hausarzt / KV-Bereitschaftsdienst durch Patienten</b>                                                                                                                 |                 |
| Hausarzt/KV-Bereitschaftsdienst wurde kontaktiert, Kontakt zum Hausarzt/ KV-Bereitschaftsdienst nicht ausreichend, Hausarzt/KV-Bereitschaftsdienst wurde nicht erreicht.                     | Mehrfachauswahl |
| <b>Kontaktaufnahme zum Hausarzt KV-Bereitschaftsdienst durch G-NFS</b>                                                                                                                       |                 |
| Hausarzt/KV-Bereitschaftsdienst wurde konsultiert, vergeblicher Versuch, Hausarzt/KV-Bereitschaftsdienst zu konsultieren, kein Versuch einer Konsultation                                    | Mehrfachauswahl |
| <b>Einschätzung des GNFS zur Kategorisierung durch die Leitstelle</b>                                                                                                                        |                 |
| richtig, zu hoch oder zu niedrig kategorisiert, telefonische Fachberatung wäre ausreichend gewesen                                                                                           | Einfachauswahl  |

**Tabelle S2:** Maßnahmen bei Einsätzen von Gemeindenotfallsanitätern, gesamt und stratifiziert nach Einsatzort

|                               | Beratung     | Hilfe bei Selbstmedikation | Medikationsgabe | Dauerkatheter | Wundversorgung | Sonstige     |
|-------------------------------|--------------|----------------------------|-----------------|---------------|----------------|--------------|
| <b>Häuslichkeit (n=1.873)</b> |              |                            |                 |               |                |              |
| <b>Altersgruppen</b>          |              |                            |                 |               |                |              |
| 65-74 Jahre                   | 85,1%        | 19,4%                      | 26,0%           | 2,5%          | 2,7%           | 40,7%        |
| 75-84 Jahre                   | 82,7%        | 17,9%                      | 23,9%           | 5,3%          | 3,3%           | 43,3%        |
| 85+ Jahre                     | 81,3%        | 18,4%                      | 22,3%           | 8,7%          | 3,0%           | 44,2%        |
| <b>Geschlecht</b>             |              |                            |                 |               |                |              |
| Männer                        | 80,6%        | 16,2%                      | 22,8%           | 10,0%         | 3,3%           | 46,0%        |
| Frauen                        | 85,2%        | 20,6%                      | 24,9%           | 1,9%          | 2,7%           | 40,3%        |
| <b>Gesamt</b>                 | <b>82,9%</b> | <b>18,4%</b>               | <b>24,0%</b>    | <b>5,7%</b>   | <b>3,1%</b>    | <b>42,9%</b> |
| <b>Pflegeheim (n=329)</b>     |              |                            |                 |               |                |              |
| <b>Altersgruppen</b>          |              |                            |                 |               |                |              |
| 65-74 Jahre                   | 51,3%        | 0%                         | 18,0%           | 30,8%         | 5,1%           | 48,7%        |
| 75-84 Jahre                   | 59,7%        | 5,6%                       | 14,6%           | 37,5%         | 5,6%           | 36,1%        |
| 85+ Jahre                     | 58,9%        | 7,5%                       | 22,6%           | 27,4%         | 7,5%           | 39,7%        |
| <b>Geschlecht</b>             |              |                            |                 |               |                |              |
| Männer                        | 53,0%        | 4,0%                       | 15,0%           | 49,5%         | 5,5%           | 35,0%        |
| Frauen                        | 66,4%        | 8,6%                       | 24,2%           | 5,5%          | 7,8%           | 45,3%        |
| <b>Gesamt</b>                 | <b>58,4%</b> | <b>5,8%</b>                | <b>18,5%</b>    | <b>32,2%</b>  | <b>6,4%</b>    | <b>39,2%</b> |
| <b>Gesamt (n=2.358)</b>       |              |                            |                 |               |                |              |
| <b>Altersgruppen</b>          |              |                            |                 |               |                |              |
| 65-74 Jahre                   | 82,7%        | 18,0%                      | 24,5%           | 4,5%          | 2,9%           | 41,3%        |
| 75-84 Jahre                   | 79,4%        | 16,2%                      | 22,6%           | 9,8%          | 3,6%           | 42,3%        |
| 85+ Jahre                     | 77,1%        | 16,4%                      | 22,4%           | 12,1%         | 3,8%           | 43,4%        |
| <b>Geschlecht</b>             |              |                            |                 |               |                |              |
| Männer                        | 75,6%        | 14,0%                      | 21,4%           | 17,2%         | 3,7%           | 44,0%        |
| Frauen                        | 83,2%        | 19,3%                      | 24,9%           | 2,3%          | 3,3%           | 40,8%        |
| <b>Gesamt</b>                 | <b>79,4%</b> | <b>16,7%</b>               | <b>23,2%</b>    | <b>9,4%</b>   | <b>3,5%</b>    | <b>42,4%</b> |

**Tabelle S3:** Charakteristika von Einsätzen in Abhängigkeit ob Anlage bzw. Entfernung eines Dauerkatheters durchgeführt wurde

|                                          | Dauerkatheter<br>(n=221) | Kein<br>Dauerkatheter<br>(n=2.137) |
|------------------------------------------|--------------------------|------------------------------------|
| Einsatzort                               |                          |                                    |
| Häuslichkeit                             | 52,0%                    | 89,6%                              |
| Pflegeheim                               | 48,0%                    | 10,4%                              |
| Alter in Jahren, Mittelwert (SD)         | 83,0 (6,7)               | 80,6 (7,8)                         |
| Geschlecht                               |                          |                                    |
| Männer                                   | 87,0%                    | 43,0%                              |
| Frauen                                   | 13,0%                    | 57,0%                              |
| Dringlichkeit des Einsatzes              |                          |                                    |
| PZC 0                                    | 81,5%                    | 53,4%                              |
| PZC 1                                    | 0%                       | 9,5%                               |
| PZC 2                                    | 1,0%                     | 22,4%                              |
| PZC 3                                    | 17,5%                    | 14,7%                              |
| Einsatzdauer in Minuten, Mittelwert (SD) | 62,9 (25,2)              | 64,2 (30,2)                        |
| Konsultation Hausarzt/ KV-Notdienst      | 6,8%                     | 16,9%                              |
| Empfehlung weiterer Versorgung           |                          |                                    |
| Vorstellung in Notaufnahme               | 5,9%                     | 41,2%                              |
| Vorstellung beim Hausarzt                | 19,5%                    | 37,9%                              |
| Vorstellung KV-Notdienst                 | 0,5%                     | 4,7%                               |
| Kein Transport erfolgt                   | 84,3%                    | 52,2%                              |
